# Supplementary material for: Sex-Dependent Effects of 7,8-Dihydroxyflavone on Metabolic Health Are Associated with Alterations in the Host Gut Microbiome
Source: Nutrients. 2021 Feb 16;13(2):637. doi: 10.3390/nu13020637 (PMC7920311; doi:10.3390/nu13020637)
Supplement: Supplementary file 1 [file nutrients-13-00637-s001.zip › Supplemetary Tables S1-S3.xlsx]

## Sheet: Supplemental Table S1
Supplemental Table S1. Topological parameters of each network
		Item	Control Male	Control Female	7,8-DHF Male	7,8-DHF Female
		# of nodes	174	172	208	216
		# of edges	282	461	577	872
		Clustering coefficient	0.374	0.43	0.417	0.435
		Connected components	12	13	22	5
		Network centralization	0.034	0.081	0.075	0.075
		Characteristic path length	8.062	6.834	5.608	4.639
		Average number of neighbors	3.241	5.36	5.548	8.074
		Network density	0.019	0.031	0.027	0.038

## Sheet: Supplemental Table S2
Supplemental Table S2. Neighbors of 7,8-DHF-responding ASVs in female mice
Negative DHF Responder					Positive DHF Responder
Control Male	Control Female	7,8-DHF Male	7,8-DHF Female		Control Male	Control Female	7,8-DHF Male	7,8-DHF Female
Desulfovibrionaceae ASV_1	Desulfovibrionaceae ASV_1	Desulfovibrionaceae ASV_1	Desulfovibrionaceae ASV_1		Muribaculaceae ASV_15	Muribaculaceae ASV_15	Muribaculaceae ASV_15	Muribaculaceae ASV_15
Muribaculaceae ASV_164	Lachnospiraceae ASV_78	Lactobacillus ASV_9	Candidatus Saccharimonas ASV_52		Faecalibaculum ASV_14		Helicobacter ASV_19	Ruminococcaceae ASV_23
Ruminococcaceae UCG-010 ASV_350		Muribaculaceae ASV_176	Lachnospiraceae ASV_152				Mitochondria ASV_39	Muribaculaceae ASV_24
			Lactobacillus ASV_341				Ruminococcaceae UCG-004 ASV_51	Alistipes ASV_50
Ruminiclostridium ASV_27	Ruminiclostridium ASV_27	Ruminiclostridium ASV_27	Ruminiclostridium ASV_27				Rikenellaceae RC9 gut group ASV_53	Ruminiclostridium ASV_58
	Erysipelatoclostridium ASV_153	Mucispirillum ASV_7	Ruminiclostridium ASV_57				Bacteroides ASV_63	Lachnospiraceae ASV_78
	Ruminococcaceae UCG-010 ASV_350		Ruminiclostridium ASV_109				Lachnospiraceae NK4A136 group ASV_72	Lachnospiraceae ASV_122
			Lachnospiraceae ASV_122				Parasutterella ASV_86	Oscillibacter ASV_126
			Blautia ASV_127				Lachnospiraceae NK4A136 group ASV_103	Lachnospiraceae ASV_135
			Lachnospiraceae ASV_138				Anaeroplasma ASV_104	Anaerovorax ASV_186
			Candidatus Saccharimonas ASV_165				Coriobacteriaceae UCG-002 ASV_155	Ruminococcaceae ASV_315
			Ruminiclostridium 5 ASV_182				Odoribacter ASV_184
			Lachnospiraceae ASV_233				Oscillibacter ASV_189
			Clostridiales vadinBB60 group ASV_297				Ruminiclostridium 5 ASV_204
			Ruminococcaceae ASV_315				Lachnospiraceae UCG-004 ASV_216
			Ruminiclostridium 5 ASV_334				Ruminococcaceae UCG-014 ASV_220
			Eubacterium brachy group ASV_450				Clostridiales vadinBB60 group ASV_243
			Candidatus Soleaferrea ASV_473		Muribaculaceae ASV_29	Muribaculaceae ASV_29	Muribaculaceae ASV_29	Muribaculaceae ASV_29
			Mucispirillum ASV_7				Lachnoclostridium ASV_199	Muribaculum ASV_202
			Lactobacillus ASV_9				Rikenellaceae RC9 gut group ASV_2	Lachnospiraceae ASV_209
			Bifidobacterium ASV_13					Desulfovibrio ASV_303
			Lactobacillus ASV_16		Clostridium sp. Culture-1 ASV_47	Clostridium sp. Culture-1 ASV_47	Clostridium sp. Culture-1 ASV_47	Clostridium sp. Culture-1 ASV_47
			Ruminococcaceae ASV_23		Ruminococcaceae UCG-004 ASV_51		Intestinimonas ASV_80	Acetatifactor ASV_101
			Ruminococcaceae ASV_25		Lachnospiraceae ASV_78		Mitochondria ASV_39	Clostridium scindens ASV_112
Rikenella ASV_41	Rikenella ASV_41	Rikenella ASV_41	Rikenella ASV_41		Muribaculaceae ASV_117			Lachnoclostridium ASV_113
Lachnospiraceae ASV_48	Lachnospiraceae ASV_48	Lachnospiraceae ASV_48	Lachnospiraceae ASV_48		Dorea ASV_195			Lachnoclostridium ASV_147
Odoribacter ASV_62	Tyzzerella 3 ASV_66	Muribaculaceae ASV_70	Lachnospiraceae ASV_77		Candidatus Saccharimonas ASV_206			Oscillibacter ASV_150
Muribaculaceae ASV_95	Blautia ASV_68	Lachnospiraceae ASV_132	Lachnospiraceae FCS020 group ASV_312		Ruminiclostridium 9 ASV_224			Mollicutes RF39 ASV_158
Desulfovibrionaceae ASV_130	Muribaculaceae ASV_70	Lachnospiraceae ASV_180	Allorhizobium-Neorhizobium-Pararhizobium-Rhizobium ASV_354		Ruminiclostridium 9 ASV_32			Ruminococcaceae UCG-003 ASV_197
Lachnospiraceae NK4A136 group ASV_36	Muribaculaceae ASV_140	Lachnospiraceae UCG-006 ASV_267	Ruminococcaceae ASV_476		Alloprevotella ASV_40			Candidatus Saccharimonas ASV_206
Lachnospiraceae ASV_44	Lachnospiraceae ASV_256	Helicobacter ASV_275	Oscillibacter ASV_43					Candidatus Saccharimonas ASV_211
	Ruminococcaceae UCG-003 ASV_271							Ruminococcaceae UCG-014 ASV_264
	Lachnospiraceae bacterium 609 ASV_12							Ruminiclostridium 9 ASV_22
Lachnospiraceae NK4A136 group ASV_76	Lachnospiraceae NK4A136 group ASV_76	Lachnospiraceae NK4A136 group ASV_76	Lachnospiraceae NK4A136 group ASV_76					Ruminococcaceae ASV_25
Ruminiclostridium 5 ASV_182	Helicobacter ASV_125	Enterorhabdus ASV_279	Muribaculaceae ASV_24					Ruminiclostridium 9 ASV_32
	Desulfovibrio ASV_377	Desulfovibrio ASV_303	Alloprevotella ASV_40					Ruminiclostridium 9 ASV_34
	Peptococcaceae ASV_74	Ruminococcaceae ASV_356						Lachnospiraceae ASV_44
		Muribaculaceae ASV_33			Lachnospiraceae NK4A136 group ASV_56	Lachnospiraceae NK4A136 group ASV_56	Lachnospiraceae NK4A136 group ASV_56	Lachnospiraceae NK4A136 group ASV_56
		Oscillibacter ASV_43			Lachnospiraceae ASV_89		Lactobacillus ASV_16	Muribaculaceae ASV_70
Lachnospiraceae ASV_77	Lachnospiraceae ASV_77	Lachnospiraceae ASV_77	Lachnospiraceae ASV_77		Anaeroplasma ASV_104			Anaeroplasma ASV_104
	Ruminiclostridium 9 ASV_82	Lachnospiraceae ASV_144	Eubacterium coprostanoligenes group ASV_81		Desulfovibrio ASV_303			Clostridium scindens ASV_112
	Parasutterella ASV_86	Lachnospiraceae ASV_146	Lachnospiraceae ASV_132					Lachnoclostridium ASV_113
	Lachnospiraceae ASV_92	Ruminococcaceae UCG-003 ASV_197	Ruminococcaceae ASV_161					Ruminococcaceae ASV_114
	Lachnospiraceae ASV_122	Lachnospiraceae ASV_313	Clostridium sp. Culture-54 ASV_208					Lactobacillus ASV_341
	Lachnospiraceae ASV_135	Lachnospiraceae NK4A136 group ASV_36	Candidatus Saccharimonas ASV_227		Enterobacteriaceae ASV_61	Enterobacteriaceae ASV_61	Enterobacteriaceae ASV_61	Enterobacteriaceae ASV_61
	Lachnoclostridium ASV_147	Ruminiclostridium 9 ASV_38	Muribaculaceae ASV_42		Acetatifactor ASV_101	Muribaculaceae ASV_95	Candidatus Saccharimonas ASV_71
	Intestinimonas ASV_218		Lachnospiraceae ASV_44		Dorea ASV_195	Muribaculaceae ASV_21	Lachnospiraceae ASV_78
	Lachnospiraceae ASV_306		Lachnospiraceae ASV_48		Muribaculaceae ASV_212	Ruminiclostridium 9 ASV_22	Muribaculaceae ASV_79
	Ruminococcaceae ASV_376		Muribaculaceae ASV_49		Clostridiales vadinBB60 group ASV_243	Muribaculaceae ASV_37	Lachnospiraceae ASV_122
	Ruminiclostridium 9 ASV_34		Candidatus Saccharimonas ASV_71				Lachnospiraceae FCS020 group ASV_156
	Lachnospiraceae NK4A136 group ASV_36						Ruminiclostridium 9 ASV_162
	Ruminiclostridium 9 ASV_38						Ruminococcaceae ASV_169
	Oscillibacter ASV_43						Ruminococcaceae ASV_282
	Rikenellaceae RC9 gut group ASV_53						Desulfovibrio ASV_303
Lachnospiraceae ASV_168	Lachnospiraceae ASV_168	Lachnospiraceae ASV_168	Lachnospiraceae ASV_168		Candidatus Saccharimonas ASV_71	Candidatus Saccharimonas ASV_71	Candidatus Saccharimonas ASV_71	Candidatus Saccharimonas ASV_71
	Lachnospiraceae ASV_233				Ruminococcaceae ASV_161		Lachnospiraceae ASV_78	Peptococcaceae ASV_74
	Clostridiales vadinBB60 group ASV_243						Lachnospiraceae ASV_122	Lachnospiraceae ASV_77
	Lactobacillus ASV_9						Clostridium sp. Culture Jar-19 ASV_139	Clostridium scindens ASV_112
	Bacteroides ASV_63						Lachnospiraceae FCS020 group ASV_156	Lachnoclostridium ASV_113
	Candidatus Saccharimonas ASV_91						Ruminiclostridium 9 ASV_162	Ruminococcaceae ASV_115
Lachnospiraceae ASV_170	Lachnospiraceae ASV_170	Lachnospiraceae ASV_170	Lachnospiraceae ASV_170				Ruminococcaceae ASV_282	Lachnospiraceae ASV_132
Muribaculaceae ASV_244	Lachnospiraceae ASV_200	Helicobacter ASV_275					Enterobacteriaceae ASV_61	Ruminococcaceae ASV_161
Lachnospiraceae ASV_252	Muribaculaceae ASV_201	Paraprevotella ASV_298						Candidatus Saccharimonas ASV_165
Peptococcus ASV_84	Muribaculum ASV_202	Bacteroides ASV_6						Gastranaerophilales ASV_179
Intestinimonas ASV_99	Alistipes ASV_207	Lachnospiraceae NK4A136 group ASV_36						Clostridium sp. Culture-54 ASV_208
Ruminococcaceae ASV_115	Ruminococcaceae UCG-014 ASV_226	Peptococcaceae ASV_74						Ruminococcaceae UCG-010 ASV_210
Ruminiclostridium ASV_120	Lachnospiraceae ASV_245	Lachnospiraceae ASV_132						Candidatus Saccharimonas ASV_227
Eubacterium xylanophilum group ASV_121	Ruminiclostridium 9 ASV_82	Muribaculaceae ASV_140						Ruminococcaceae UCG-014 ASV_264
Clostridium sp. Culture Jar-19 ASV_139	Muribaculaceae ASV_105	Lachnospiraceae ASV_146						Ruminococcaceae UCG-009 ASV_353
	Muribaculaceae ASV_117	Ruminiclostridium ASV_159						Rikenella ASV_30
	Lachnospiraceae ASV_138	Peptococcaceae ASV_166						Lachnospiraceae ASV_44
	Lachnospiraceae ASV_144							Lachnoclostridium ASV_46
Lachnospiraceae ASV_292	Lachnospiraceae ASV_292	Lachnospiraceae ASV_292	Lachnospiraceae ASV_292					Muribaculaceae ASV_49
	Lachnospiraceae ASV_157	Erysipelotrichaceae ASV_423						Muribaculaceae ASV_70
	Ruminiclostridium 5 ASV_190	Lachnospiraceae bacterium 609 ASV_12			Muribaculaceae ASV_117	Muribaculaceae ASV_117	Muribaculaceae ASV_117	Muribaculaceae ASV_117
	Muribaculaceae ASV_194	Bifidobacterium ASV_13			Clostridium sp. Culture-1 ASV_47	Lachnospiraceae ASV_170	Blautia ASV_127	Mollicutes RF39 ASV_158
	Gastranaerophilales ASV_258	Ruminiclostridium 9 ASV_32			Ruminococcaceae UCG-004 ASV_51	Muribaculum ASV_202	Muribaculaceae ASV_181	Ruminococcaceae UCG-003 ASV_197
		Bacteroides ASV_63			Muribaculaceae ASV_67	Lachnospiraceae ASV_245	Anaerovorax ASV_186	Clostridiales vadinBB60 group ASV_297
		Blautia ASV_68			Acetatifactor ASV_101		Lachnoclostridium ASV_337	Ruminococcaceae ASV_25
		Oscillibacter ASV_126						Anaeroplasma ASV_104
		Lachnospiraceae ASV_136			Lachnospiraceae ASV_132	Lachnospiraceae ASV_132	Lachnospiraceae ASV_132	Lachnospiraceae ASV_132
		Ruminococcaceae ASV_151			Muribaculaceae ASV_49		Ruminiclostridium ASV_159	Clostridium sp. Culture Jar-19 ASV_139
		Ruminiclostridium ASV_159					Peptococcaceae ASV_166	Ruminococcaceae ASV_161
		Candidatus Saccharimonas ASV_165					Lachnospiraceae ASV_170	Clostridium sp. Culture-54 ASV_208
		Clostridium sp. Clone-47 ASV_196					Lachnospiraceae ASV_180	Ruminiclostridium 9 ASV_224
		Ruminiclostridium 5 ASV_204					Ureaplasma ASV_198	Ruminiclostridium 9 ASV_32
		Clostridium sp. Culture-54 ASV_208					Lachnospiraceae UCG-006 ASV_267	Ruminiclostridium 9 ASV_38
		Muribaculaceae ASV_248					Helicobacter ASV_275	Muribaculaceae ASV_42
		Lachnospiraceae ASV_256					Lachnospiraceae ASV_48	Lachnospiraceae ASV_44
							Muribaculaceae ASV_70	Muribaculaceae ASV_70
							Peptococcaceae ASV_74	Candidatus Saccharimonas ASV_71
								Lachnospiraceae ASV_77
								Intestinimonas ASV_80
								Eubacterium coprostanoligenes group ASV_81
								Ruminiclostridium 9 ASV_87
								Acetatifactor ASV_90
								Lachnoclostridium ASV_113
					Muribaculaceae ASV_137	Muribaculaceae ASV_137	Muribaculaceae ASV_137	Muribaculaceae ASV_137
								Ruminiclostridium 9 ASV_34
					Lachnospiraceae ASV_146	Lachnospiraceae ASV_146	Lachnospiraceae ASV_146	Lachnospiraceae ASV_146
							Ruminococcaceae ASV_160	Mollicutes RF39 ASV_158
							Lachnospiraceae ASV_170
							Ureaplasma ASV_198
							Helicobacter ASV_275
							Lachnospiraceae ASV_313
							Ruminococcaceae ASV_25
							Lachnospiraceae NK4A136 group ASV_36
							Peptococcaceae ASV_74
							Lachnospiraceae ASV_77
					Roseburia ASV_247	Roseburia ASV_247	Roseburia ASV_247	Roseburia ASV_247
					Eubacterium nodatum group ASV_269			Bacteroides ASV_249
								Clostridiales vadinBB60 group ASV_291
								Lachnospiraceae FCS020 group ASV_312
								Ruminococcaceae UCG-009 ASV_353
								Acinetobacter ASV_466
								Ruminococcaceae ASV_476
								Lachnospiraceae bacterium 609 ASV_12
								Lachnospiraceae ASV_141
								Ruminococcaceae ASV_169
					Eubacterium nodatum group ASV_269	Eubacterium nodatum group ASV_269	Eubacterium nodatum group ASV_269	Eubacterium nodatum group ASV_269
					Rikenella ASV_30			Muribaculaceae ASV_164
					Ruminococcaceae ASV_106			Dorea ASV_195
					Lachnospiraceae ASV_214
					Intestinimonas ASV_218
					Roseburia ASV_247
					Candidatus Soleaferrea ASV_290	Candidatus Soleaferrea ASV_290	Candidatus Soleaferrea ASV_290	Candidatus Soleaferrea ASV_290
					Turicibacter ASV_11			Lachnospiraceae ASV_311
					Gastranaerophilales ASV_179			Lachnospiraceae ASV_10
					Ruminiclostridium 5 ASV_238			Ruminiclostridium 9 ASV_34
								Lachnoclostridium ASV_46
								Clostridium scindens ASV_112
								Lachnospiraceae ASV_138
								Lachnoclostridium ASV_199
								Ruminococcaceae UCG-014 ASV_264

## Sheet: Supplemental Table S3
Supplemental Table S3. Neighbors of 7,8-DHF-responding ASVs in male mice
Negative 7,8-DHF Responder					Positive DHF Responder
Control Male	Control Female	7,8-DHF Male	7,8-DHF Female		Control Male	Control Female	7,8-DHF Male	7,8-DHF Female
Lachnospiraceae ASV_44	Lachnospiraceae ASV_44	Lachnospiraceae ASV_44	Lachnospiraceae ASV_44		Rikenella ASV_41	Rikenella ASV_41	Rikenella ASV_41	Rikenella ASV_41
Lachnospiraceae ASV_48	Lachnospiraceae ASV_152		Clostridium sp. Culture-1 ASV_47		Lachnospiraceae ASV_77	Lachnospiraceae ASV_77	Lachnospiraceae ASV_77	Lachnospiraceae ASV_77
Odoribacter ASV_62			Muribaculaceae ASV_49			Ruminiclostridium 9 ASV_82	Lachnospiraceae ASV_144	Eubacterium coprostanoligenes group ASV_81
Muribaculaceae ASV_79			Muribaculaceae ASV_70			Parasutterella ASV_86	Lachnospiraceae ASV_146	Lachnospiraceae ASV_132
Brachyspira sp. NSH-25 ASV_110			Candidatus Saccharimonas ASV_71			Lachnospiraceae ASV_92	Ruminococcaceae UCG-003 ASV_197	Ruminococcaceae ASV_161
Desulfovibrionaceae ASV_130			Lachnospiraceae ASV_77			Lachnospiraceae ASV_122	Lachnospiraceae ASV_313	Clostridium sp. Culture-54 ASV_208
Oscillibacter ASV_228			Acetatifactor ASV_90			Lachnospiraceae ASV_135	Lachnospiraceae NK4A136 group ASV_36	Candidatus Saccharimonas ASV_227
			Acetatifactor ASV_101			Lachnoclostridium ASV_147	Ruminiclostridium 9 ASV_38	Muribaculaceae ASV_42
			Clostridium scindens ASV_112			Intestinimonas ASV_218		Lachnospiraceae ASV_44
			Lachnoclostridium ASV_113			Lachnospiraceae ASV_306		Lachnospiraceae ASV_48
			Lachnospiraceae ASV_132			Ruminococcaceae ASV_376		Muribaculaceae ASV_49
			Oscillibacter ASV_150			Ruminiclostridium 9 ASV_34		Candidatus Saccharimonas ASV_71
			Ruminococcaceae ASV_161			Lachnospiraceae NK4A136 group ASV_36
			Candidatus Saccharimonas ASV_165			Ruminiclostridium 9 ASV_38
			Clostridium sp. Culture-54 ASV_208			Oscillibacter ASV_43
			Ruminiclostridium 9 ASV_224			Rikenellaceae RC9 gut group ASV_53
			Candidatus Saccharimonas ASV_227		Lachnospiraceae ASV_10	Lachnospiraceae ASV_10	Lachnospiraceae ASV_10	Lachnospiraceae ASV_10
			Ruminococcaceae UCG-014 ASV_264			Blautia ASV_68	Muribaculaceae ASV_37	Ruminococcaceae ASV_23
			Lachnospiraceae ASV_277			Lachnospiraceae NK4A136 group ASV_88		Ruminococcaceae ASV_25
			Rikenella ASV_30			Lachnospiraceae ASV_152		Lachnoclostridium ASV_46
			Ruminiclostridium 9 ASV_32			Ruminiclostridium 5 ASV_190		Ruminiclostridium ASV_57
			Ruminiclostridium 9 ASV_34			Muribaculaceae ASV_194		Clostridium scindens ASV_112
Lachnospiraceae ASV_92	Lachnospiraceae ASV_92	Lachnospiraceae ASV_92	Lachnospiraceae ASV_92					Candidatus Saccharimonas ASV_227
Lachnospiraceae ASV_142	Lachnospiraceae ASV_122		Oscillibacter ASV_43					Muribaculaceae ASV_246
Oscillibacter ASV_35	Lachnospiraceae ASV_135							Ruminococcaceae UCG-014 ASV_264
	Lachnospiraceae ASV_138							Candidatus Soleaferrea ASV_290
	Lachnoclostridium ASV_147							Lachnospiraceae ASV_311
	Intestinimonas ASV_218							Lactobacillus ASV_9
	Mollicutes RF39 ASV_239				Rikenellaceae RC9 gut group ASV_53	Rikenellaceae RC9 gut group ASV_53	Rikenellaceae RC9 gut group ASV_53	Rikenellaceae RC9 gut group ASV_53
	Lachnospiraceae ASV_306				Candidatus Saccharimonas ASV_91	Lachnospiraceae ASV_77	Bacteroides ASV_63	Ruminiclostridium ASV_58
	Ruminococcaceae ASV_376				Clostridium scindens ASV_112	Ruminiclostridium 9 ASV_82	Lachnospiraceae NK4A136 group ASV_72	Lachnospiraceae ASV_78
	Lachnospiraceae NK4A136 group ASV_36				Lachnospiraceae ASV_143	Parasutterella ASV_86	Dubosiella newyorkensis ASV_96	Parabacteroides ASV_102
	Ruminiclostridium 9 ASV_38				Ruminococcaceae ASV_213	Lachnospiraceae ASV_92	Parabacteroides ASV_102	Clostridiales vadinBB60 group ASV_243
	Rikenellaceae RC9 gut group ASV_53					Lachnospiraceae ASV_122	Lachnospiraceae NK4A136 group ASV_103	Rikenellaceae RC9 gut group ASV_2
	Lachnospiraceae ASV_77					Lachnospiraceae ASV_135	Ruminococcaceae ASV_151	Alistipes ASV_50
	Ruminiclostridium 9 ASV_82					Lachnoclostridium ASV_147	Coriobacteriaceae UCG-002 ASV_155
	Parasutterella ASV_86					Peptococcaceae ASV_166	Ruminiclostridium 5 ASV_182
Ruminococcaceae ASV_114	Ruminococcaceae ASV_114	Ruminococcaceae ASV_114	Ruminococcaceae ASV_114			Muribaculaceae ASV_201	Clostridium sp. Clone-47 ASV_196
Lachnospiraceae UCG-004 ASV_216			Lactobacillus ASV_341			Intestinimonas ASV_218	Ruminiclostridium 5 ASV_204
Lachnoclostridium ASV_223			Lachnospiraceae NK4A136 group ASV_56			Ruminococcaceae UCG-014 ASV_226	Clostridiales vadinBB60 group ASV_243
Clostridiales vadinBB60 group ASV_314						Ruminococcaceae UCG-003 ASV_271	Erysipelotrichaceae ASV_423
Peptococcus ASV_84						Clostridiales vadinBB60 group ASV_274	Bifidobacterium ASV_13
Muribaculaceae ASV_128	Muribaculaceae ASV_128	Muribaculaceae ASV_128	Muribaculaceae ASV_128			Lachnospiraceae ASV_306	Faecalibaculum ASV_14
Ureaplasma ASV_198	Muribaculaceae ASV_194		Lachnospiraceae ASV_200			Ruminococcaceae ASV_376	Muribaculaceae ASV_15
Clostridiales vadinBB60 group ASV_321	Peptococcaceae ASV_74		Oscillibacter ASV_217			Lachnospiraceae NK4A136 group ASV_36	Helicobacter ASV_19
Muribaculaceae ASV_8	Lachnospiraceae NK4A136 group ASV_88		Lachnospiraceae ASV_245			Ruminiclostridium 9 ASV_38	Ruminococcaceae UCG-004 ASV_51
Intestinimonas ASV_99			Helicobacter ASV_3			Oscillibacter ASV_43
			Ruminiclostridium 9 ASV_38		Muribaculaceae ASV_70	Muribaculaceae ASV_70	Muribaculaceae ASV_70	Muribaculaceae ASV_70
			Muribaculaceae ASV_42		Lactococcus ASV_111	Muribaculaceae ASV_140	Lachnospiraceae ASV_132	Candidatus Saccharimonas ASV_71
			Intestinimonas ASV_80		Ureaplasma ASV_198	Lachnospiraceae ASV_256	Lachnospiraceae ASV_180	Ruminiclostridium 9 ASV_87
			Parabacteroides ASV_93		Lachnospiraceae ASV_17	Ruminococcaceae UCG-003 ASV_271	Ureaplasma ASV_198	Acetatifactor ASV_90
			Lachnospiraceae NK4A136 group ASV_103		Lachnospiraceae ASV_26	Lachnospiraceae ASV_306	Lachnospiraceae UCG-006 ASV_267	Clostridium scindens ASV_112
Clostridiales bacterium CIEAF 016 ASV_173	Clostridiales bacterium CIEAF 016 ASV_173	Clostridiales bacterium CIEAF 016 ASV_173	Clostridiales bacterium CIEAF 016 ASV_173		Lachnospiraceae ASV_55	Lachnospiraceae bacterium 609 ASV_12	Helicobacter ASV_275	Lachnoclostridium ASV_113
Oscillibacter ASV_221	Lachnospiraceae ASV_214		Lachnospiraceae ASV_362			Oscillibacter ASV_43	Lachnospiraceae ASV_48	Lachnospiraceae ASV_132
Muribaculaceae ASV_42	Clostridium sp. Culture Jar-19 ASV_139		Ruminiclostridium ASV_20			Lachnospiraceae ASV_48		Clostridium sp. Culture Jar-19 ASV_139
			Lachnospiraceae ASV_89			Tyzzerella 3 ASV_66		Ruminococcaceae ASV_161
			Candidatus Saccharimonas ASV_91			Blautia ASV_68		Clostridium sp. Culture-54 ASV_208
			Lachnoclostridium ASV_147					Oscillibacter ASV_43
			Lachnospiraceae ASV_152					Lachnospiraceae ASV_44
Ruminiclostridium 9 ASV_22	Ruminiclostridium 9 ASV_22	Ruminiclostridium 9 ASV_22	Ruminiclostridium 9 ASV_22					Candidatus Saccharimonas ASV_52
Lachnospiraceae ASV_65	Muribaculaceae ASV_33	Ruminiclostridium 9 ASV_38	Romboutsia ASV_31					Lachnospiraceae ASV_55
Tyzzerella 3 ASV_66	Enterobacteriaceae ASV_61	Clostridium scindens ASV_112	Ruminiclostridium 9 ASV_34					Lachnospiraceae NK4A136 group ASV_56
Lachnospiraceae ASV_230		Ruminococcaceae ASV_161	Clostridium sp. Culture-1 ASV_47		Candidatus Saccharimonas ASV_91	Candidatus Saccharimonas ASV_91	Candidatus Saccharimonas ASV_91	Candidatus Saccharimonas ASV_91
		Ruminiclostridium 5 ASV_190	Romboutsia ASV_83		Ruminiclostridium ASV_109	Lachnospiraceae ASV_124	Ruminococcaceae ASV_235	Blautia ASV_127
		Gastranaerophilales ASV_357	Candidatus Saccharimonas ASV_91		Clostridium scindens ASV_112	Lachnospiraceae ASV_168	Lachnoclostridium ASV_337	Lachnospiraceae ASV_152
		Bacteroides ASV_6	Acetatifactor ASV_101		Lachnospiraceae ASV_143	Bacteroides ASV_63		Clostridiales bacterium CIEAF 016 ASV_173
			Lachnoclostridium ASV_113		Rikenellaceae RC9 gut group ASV_53			Candidatus Saccharimonas ASV_211
			Lachnospiraceae ASV_138					Oscillibacter ASV_228
			Lachnoclostridium ASV_147					Candidatus Soleaferrea ASV_473
			Oscillibacter ASV_150					Ruminiclostridium ASV_20
			Candidatus Saccharimonas ASV_206					Ruminiclostridium 9 ASV_22
			Candidatus Saccharimonas ASV_211					Romboutsia ASV_31
			Ruminococcaceae UCG-014 ASV_264					Oscillibacter ASV_35
			Lachnospiraceae ASV_277					Lachnospiraceae ASV_65
			Ruminiclostridium 5 ASV_334					Tyzzerella 3 ASV_66
			Lachnospiraceae ASV_362					Romboutsia ASV_83
			Candidatus Soleaferrea ASV_473		Lachnospiraceae ASV_143	Lachnospiraceae ASV_143	Lachnospiraceae ASV_143	Lachnospiraceae ASV_143
			Ruminiclostridium ASV_20		Rikenellaceae RC9 gut group ASV_53		Lachnospiraceae NK4A136 group ASV_88	Lachnospiraceae ASV_281
					Candidatus Saccharimonas ASV_91
					Ruminiclostridium ASV_109
					Clostridium scindens ASV_112
					Candidatus Saccharimonas ASV_165	Candidatus Saccharimonas ASV_165	Candidatus Saccharimonas ASV_165	Candidatus Saccharimonas ASV_165
							Lachnospiraceae ASV_292	Gastranaerophilales ASV_179
							Erysipelotrichaceae ASV_423	Lactobacillus ASV_193
							Bifidobacterium ASV_13	Ruminococcaceae UCG-010 ASV_210
							Dubosiella ASV_59	Candidatus Saccharimonas ASV_227
								Lachnospiraceae ASV_233
								Ruminococcaceae UCG-014 ASV_264
								Ruminiclostridium 5 ASV_334
								Lactobacillus ASV_9
								Lactobacillus ASV_16
								Ruminococcaceae ASV_23
								Ruminiclostridium ASV_27
								Lachnospiraceae ASV_44
								Lachnoclostridium ASV_46
								Muribaculaceae ASV_49
								Ruminiclostridium ASV_57
								Candidatus Saccharimonas ASV_71
								Clostridium scindens ASV_112
								Ruminococcaceae ASV_115
								Lachnospiraceae ASV_138
					Muribaculaceae ASV_191	Muribaculaceae ASV_191	Muribaculaceae ASV_191	Muribaculaceae ASV_191
							Lachnospiraceae ASV_261
					Muribaculaceae ASV_194	Muribaculaceae ASV_194	Muribaculaceae ASV_194	Muribaculaceae ASV_194
						Lachnospiraceae ASV_292	Lachnospiraceae ASV_200
						Lachnospiraceae ASV_10	Candidatus Saccharimonas ASV_211
						Blautia ASV_68	Ruminococcaceae UCG-009 ASV_232
						Lachnospiraceae NK4A136 group ASV_88
						Muribaculaceae ASV_128
						Ruminiclostridium 5 ASV_190
					Lachnospiraceae ASV_209	Lachnospiraceae ASV_209	Lachnospiraceae ASV_209	Lachnospiraceae ASV_209
							Ruminiclostridium ASV_58	Desulfovibrio ASV_303
								Muribaculaceae ASV_29
								Lachnospiraceae ASV_157
					Lachnospiraceae ASV_254	Lachnospiraceae ASV_254	Lachnospiraceae ASV_254	Lachnospiraceae ASV_254
							Lachnospiraceae ASV_171	Lachnospiraceae ASV_281
								Parasutterella ASV_86
					Lachnospiraceae ASV_261	Lachnospiraceae ASV_261	Lachnospiraceae ASV_261	Lachnospiraceae ASV_261
							Muribaculaceae ASV_191
					Lachnoclostridium ASV_337	Lachnoclostridium ASV_337	Lachnoclostridium ASV_337	Lachnoclostridium ASV_337
							Candidatus Saccharimonas ASV_91
							Muribaculaceae ASV_117
							Muribaculaceae ASV_181
							Anaerovorax ASV_186
							Ruminococcaceae ASV_235
